# Supplementary material for: Reduced Expression of Mismatch Repair Genes MSH6/MSH2 Directly Promotes Pituitary Tumor Growth via the ATR–Chk1 Pathway
Source: Oxford University Press journal article supplement (doi:10.1210/jc.2017-02332), 2018-01-12
Supplement: jc.2017-02332_supplemental_figure_1.pdf [file jc.2017-02332_supplemental_figure_1.pdf]

# Supplemental Figure1

## Quantitative immunohistochemistry analysis of MSH6.

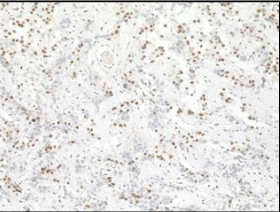

Low protein expression of MSH6

intensity : 159

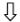

**Protein expression level : 13**

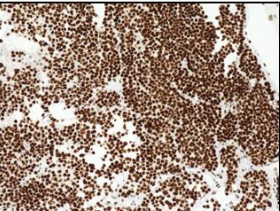

High protein expression of MSH6

intensity : 95

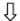

**Protein expression level : 77**

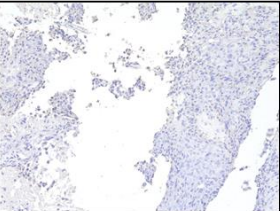

Normal pituitary (unstained)

intensity : 172

**Quantitative analysis of MSH6 protein**

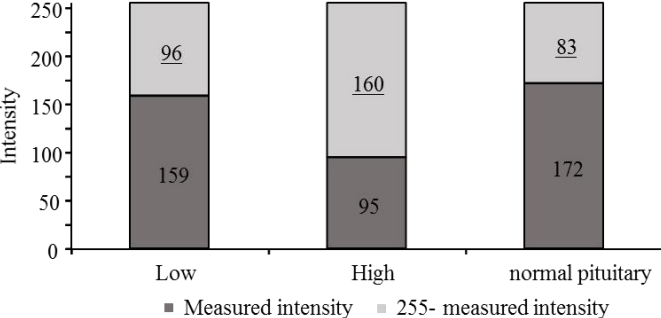

Corrected by the value of normal pituitary gland

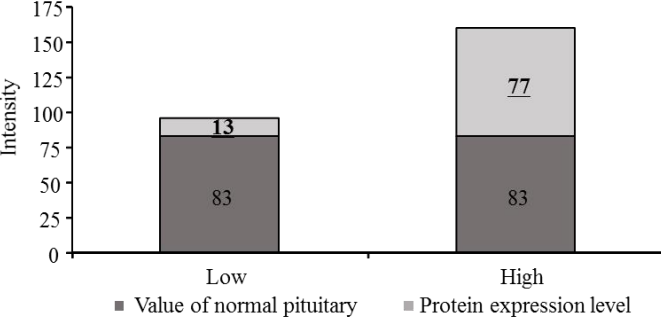

## Supplemental Figure 2

### Correlation between expression of MMR genes other than *MSH6* and *MSH2* and $\text{Log}_2$ TVDT.

Expression of other MMR genes (*MLH1*, *PMS2*, *MLH3*, *MSH3*, *PMS1*, and *EPCAM*) was not associated with  $\text{Log}_2$  TVDT.

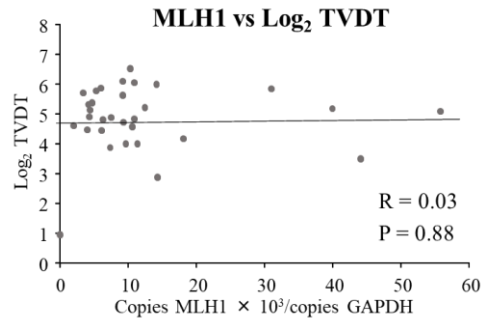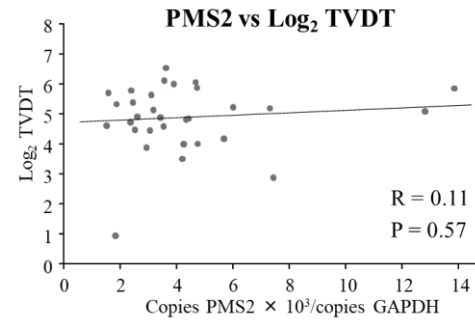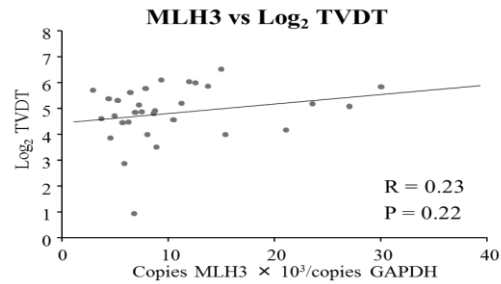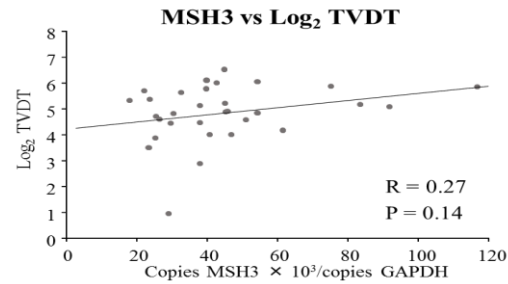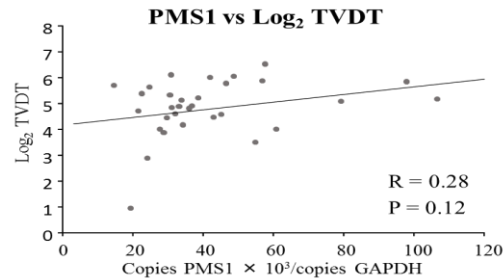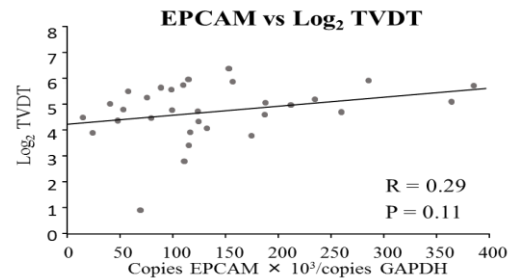

# Supplemental Table1A

## Clinical, imageological, and histopathological characteristics of 47 patients with PA at Wakayama Medical University Hospital.

| Case Number | sex    | age (years) | Clinical phenotype                | Pathological phenotype            | micro/macro | preoperative TV(cm <sup>3</sup> ) | TVDT (month) | Time Interval of MRI (month) | follow-up period (month) | MIB-1 LI (%) | recurrence |
|-------------|--------|-------------|-----------------------------------|-----------------------------------|-------------|-----------------------------------|--------------|------------------------------|--------------------------|--------------|------------|
| 1           | male   | 43          | Nonfunctioning adenoma            | Gonadotroph adenoma               | macro       | 11.67                             | 54.4         | 48.5                         | 49.8                     | 1.7          | -          |
| 2           | male   | 55          | Nonfunctioning adenoma            | Gonadotroph adenoma               | macro       | 6.99                              | 24.1         | 49.5                         | 51.0                     | 1.1          | +          |
| 3           | male   | 70          | Nonfunctioning adenoma            | Gonadotroph adenoma               | macro       | 5.77                              | 22.0         | 44.2                         | 46.0                     | 1.0          | +          |
| 4           | male   | 71          | Nonfunctioning adenoma            | Gonadotroph adenoma               | macro       | 5.86                              | 34.7         | 50.2                         | 53.6                     | 1.5          | -          |
| 5           | female | 69          | Nonfunctioning adenoma            | Gonadotroph adenoma               | macro       | 5.73                              | 29.8         | 42.6                         | 44.1                     | 2.3          | -          |
| 6           | female | 54          | Nonfunctioning adenoma            | Gonadotroph adenoma               | macro       | 2.25                              | 15.8         | 32.4                         | 35.8                     | 1.2          | -          |
| 7           | male   | 67          | Nonfunctioning adenoma            | Gonadotroph adenoma               | macro       | 7.07                              | 57.8         | 41.9                         | 43.4                     | 1.6          | -          |
| 8           | male   | 49          | Nonfunctioning adenoma            | Gonadotroph adenoma               | macro       | 8.62                              | 23.6         | 29.2                         | 31.6                     | 1.2          | -          |
| 9*          | male   | 57          | Plurihormonal adenoma (PRL, ACTH) | Plurihormonal adenoma (PRL, ACTH) | macro       | 9.46                              | N.A          | N.A                          | N.A                      | 1.1          | -          |
| 10          | female | 43          | Thyrotroph adenoma                | Thyrotroph adenoma                | macro       | 0.50                              | 36.0         | 20.3                         | 23.9                     | 0.3          | -          |
| 11          | female | 42          | Nonfunctioning adenoma            | Gonadotroph adenoma               | macro       | 12.17                             | 68.3         | 18.6                         | 21.3                     | 1.9          | +          |
| 12**        | male   | 37          | Somatotroph adenoma               | Somatotroph adenoma               | macro       | 1.15                              | N.A          | N.A                          | N.A                      | 2.5          | -          |
| 13          | male   | 53          | Nonfunctioning adenoma            | Silent thyrotroph adenoma         | macro       | 24.08                             | 65.6         | 19.0                         | 21.3                     | 0.6          | -          |
| 14          | female | 24          | Lactotroph adenoma                | Lactotroph adenoma                | micro       | 0.95                              | N.A          | N.A                          | N.A                      | 4.6          | -          |
| 15***       | female | 49          | Somatotroph adenoma               | Somatotroph adenoma               | macro       | 3.60                              | N.A          | N.A                          | N.A                      | 2.5          | -          |
| 16          | female | 70          | Nonfunctioning adenoma            | Gonadotroph adenoma               | macro       | 12.89                             | 36.8         | 24.8                         | 26.8                     | 3.3          | +          |
| 17          | female | 76          | Nonfunctioning adenoma            | Gonadotroph adenoma               | macro       | 9.70                              | 57.1         | 17.7                         | 21.1                     | 1.6          | -          |
| 18          | male   | 22          | Lactotroph adenoma                | Lactotroph adenoma                | macro       | 1.61                              | 33.6         | 12.2                         | 14.7                     | 3.2          | -          |
| 19          | female | 42          | Nonfunctioning adenoma            | Silent thyrotroph adenoma         | macro       | 39.91                             | 21.6         | 4.8                          | 6.7                      | 6.2          | +          |
| 20          | male   | 32          | Lactotroph adenoma                | Lactotroph adenoma                | macro       | 12.66                             | N.A          | N.A                          | N.A                      | 2.2          | -          |
| 21          | female | 61          | Nonfunctioning adenoma            | Silent lactotroph adenoma         | macro       | 8.37                              | 14.5         | 18.0                         | 20.0                     | 1.2          | -          |
| 22          | female | 74          | Nonfunctioning adenoma            | Silent thyrotroph adenoma         | macro       | 4.12                              | 29.3         | 17.9                         | 19.5                     | 1.7          | -          |
| 23          | female | 65          | Nonfunctioning adenoma            | Gonadotroph adenoma               | macro       | 22.25                             | 91.3         | 10.1                         | 10.2                     | 3.3          | +          |
| 24          | female | 65          | Nonfunctioning adenoma            | Silent somatotroph adenoma        | macro       | 6.03                              | N.A          | N.A                          | N.A                      | 3.4          | -          |
| 25          | female | 68          | Corticotroph adenoma              | Corticotroph adenoma              | macro       | 2.72                              | 1.9          | 1.8                          | 3.5                      | 20.0         | -          |
| 26          | male   | 68          | Nonfunctioning adenoma            | Gonadotroph adenoma               | macro       | 16.50                             | 63.5         | 11.0                         | 15.7                     | 4.5          | +          |
| 27          | female | 50          | Nonfunctioning adenoma            | Silent somatotroph adenoma        | macro       | 5.72                              | 7.3          | 5.5                          | 8.9                      | 1.6          | -          |
| 28          | male   | 65          | Nonfunctioning adenoma            | Silent somatotroph adenoma        | macro       | 22.19                             | 51.6         | 12.2                         | 14.2                     | 0.4          | +          |
| 29          | female | 56          | Somatotroph adenoma               | Somatotroph adenoma               | micro       | 0.36                              | N.A          | N.A                          | N.A                      | 0.6          | -          |
| 30          | male   | 77          | Nonfunctioning adenoma            | Silent somatotroph adenoma        | macro       | 3.82                              | 15.9         | 12.4                         | 14.3                     | 0.9          | -          |
| 31          | female | 60          | Nonfunctioning adenoma            | Gonadotroph adenoma               | macro       | 7.87                              | 26.1         | 12.9                         | 15.3                     | 1.4          | +          |
| 32          | female | 63          | Nonfunctioning adenoma            | Gonadotroph adenoma               | macro       | 3.66                              | 49.0         | 6.7                          | 8.4                      | 0.3          | -          |
| 33          | male   | 61          | Somatotroph adenoma               | Somatotroph adenoma               | macro       | 1.59                              | N.A          | N.A                          | N.A                      | 0.2          | -          |
| 34          | male   | 47          | Nonfunctioning adenoma            | Gonadotroph adenoma               | macro       | 10.59                             | 41.3         | 12.2                         | 14.1                     | 5.9          | -          |
| 35          | female | 71          | Somatotroph adenoma               | Somatotroph adenoma               | macro       | 4.49                              | N.A          | N.A                          | N.A                      | 1.2          | -          |
| 36          | female | 55          | Somatotroph adenoma               | Somatotroph adenoma               | macro       | 1.82                              | N.A          | N.A                          | N.A                      | 1.5          | -          |
| 37          | female | 42          | Nonfunctioning adenoma            | Gonadotroph adenoma               | macro       | 41.31                             | N.A          | N.A                          | N.A                      | 4.2          | +          |
| 38          | female | 71          | Nonfunctioning adenoma            | Gonadotroph adenoma               | macro       | 9.82                              | N.A          | N.A                          | N.A                      | 1.2          | -          |
| 39          | male   | 47          | Nonfunctioning adenoma            | Gonadotroph adenoma               | macro       | 7.45                              | 39.7         | 6.3                          | 7.9                      | 1.1          | +          |
| 40          | female | 63          | Nonfunctioning adenoma            | Silent somatotroph adenoma        | macro       | 49.23                             | 28.4         | 4.6                          | 4.9                      | 2.4          | +          |
| 41          | female | 54          | Nonfunctioning adenoma            | Gonadotroph adenoma               | macro       | 9.00                              | 27.8         | 6.1                          | 7.7                      | 1.9          | -          |
| 42          | male   | 72          | Nonfunctioning adenoma            | Silent lactotroph adenoma         | macro       | 3.54                              | N.A          | N.A                          | N.A                      | 1.0          | -          |
| 43          | female | 63          | Nonfunctioning adenoma            | Gonadotroph adenoma               | macro       | 2.96                              | 17.9         | 4.1                          | 5.5                      | 3.4          | -          |
| 44          | male   | 40          | Nonfunctioning adenoma            | Gonadotroph adenoma               | macro       | 3.15                              | N.A          | N.A                          | N.A                      | 6.6          | -          |
| 45          | female | 51          | Nonfunctioning adenoma            | Gonadotroph adenoma               | macro       | 8.40                              | N.A          | N.A                          | N.A                      | 2.3          | +          |
| 46          | female | 33          | Corticotroph adenoma              | Corticotroph adenoma              | macro       | 10.72                             | 11.2         | 3.6                          | 3.8                      | 10.7         | +          |
| 47          | male   | 59          | Nonfunctioning adenoma            | Gonadotroph adenoma               | macro       | 7.48                              | N.A          | N.A                          | N.A                      | 0.8          | -          |

N.A.; not available \*; *MEN1* Gly156Arg(germline and somatic mutation)

\*\*; *GNAS* Gln227His (somatic mutation) \*\*\*; *GNAS* Arg201Cys (somatic mutation)

# Supplemental Table1B

## Clinical, imageological, and histopathological characteristics of 46 patients with PA at Toranomom Hospital.

| Case Number | sex    | age | Clinical phenotype     | Pathological phenotype                    | micro/macro | MIB-1 LI(%) | recurrence |
|-------------|--------|-----|------------------------|-------------------------------------------|-------------|-------------|------------|
| 1           | male   | 71  | Nonfunctioning adenoma | Gonadotroph adenoma                       | macro       | 4.1         | -          |
| 2           | female | 41  | Nonfunctioning adenoma | Gonadotroph adenoma                       | macro       | 0.6         | -          |
| 3           | female | 53  | Nonfunctioning adenoma | null cell adenoma                         | macro       | 2.2         | -          |
| 4           | female | 19  | Nonfunctioning adenoma | Silent somatotroph adenoma                | macro       | 3.6         | +          |
| 5           | female | 21  | Nonfunctioning adenoma | Gonadotroph adenoma                       | macro       | 3.2         | -          |
| 6           | female | 72  | Nonfunctioning adenoma | Silent corticotroph adenoma               | macro       | 0.3         | -          |
| 7           | male   | 65  | Nonfunctioning adenoma | Gonadotroph adenoma                       | macro       | 0.5         | -          |
| 8           | female | 53  | Nonfunctioning adenoma | Gonadotroph adenoma                       | macro       | 1.6         | -          |
| 9           | female | 62  | Nonfunctioning adenoma | Gonadotroph adenoma                       | macro       | 1.2         | -          |
| 10          | male   | 31  | Nonfunctioning adenoma | Silent lactotroph adenoma                 | macro       | 3.8         | -          |
| 11          | male   | 60  | Nonfunctioning adenoma | null cell adenoma                         | macro       | 0.9         | -          |
| 12          | male   | 69  | Nonfunctioning adenoma | Gonadotroph adenoma                       | macro       | 1.9         | -          |
| 13          | male   | 68  | Nonfunctioning adenoma | Gonadotroph adenoma                       | macro       | 1           | -          |
| 14          | male   | 41  | Nonfunctioning adenoma | Gonadotroph adenoma                       | macro       | 1.4         | -          |
| 15          | male   | 36  | Nonfunctioning adenoma | Gonadotroph adenoma                       | macro       | 1.1         | -          |
| 16          | female | 40  | Nonfunctioning adenoma | Silent corticotroph adenoma               | macro       | 1.5         | -          |
| 17          | female | 65  | Nonfunctioning adenoma | Silent corticotroph adenoma               | macro       | 2.4         | -          |
| 18          | male   | 60  | Nonfunctioning adenoma | Gonadotroph adenoma                       | macro       | 2.4         | -          |
| 19          | male   | 56  | Nonfunctioning adenoma | Gonadotroph adenoma                       | macro       | 1.9         | -          |
| 20          | female | 62  | Nonfunctioning adenoma | Gonadotroph adenoma                       | macro       | 2.3         | -          |
| 21          | male   | 66  | Nonfunctioning adenoma | Gonadotroph adenoma                       | macro       | 2.8         | -          |
| 22          | male   | 35  | Nonfunctioning adenoma | Gonadotroph adenoma                       | macro       | 2.2         | -          |
| 23          | female | 43  | Nonfunctioning adenoma | Silent corticotroph adenoma               | macro       | 0.9         | -          |
| 24          | female | 49  | Nonfunctioning adenoma | Gonadotroph adenoma                       | macro       | 1.7         | +          |
| 25          | male   | 61  | Nonfunctioning adenoma | Silent corticotroph adenoma               | macro       | 1.9         | -          |
| 26          | female | 71  | Nonfunctioning adenoma | Gonadotroph adenoma                       | macro       | 2.8         | +          |
| 27          | female | 53  | Nonfunctioning adenoma | Silent corticotroph adenoma               | macro       | 1.6         | -          |
| 28          | female | 80  | Nonfunctioning adenoma | Gonadotroph adenoma                       | macro       | 1.6         | -          |
| 29          | female | 35  | Nonfunctioning adenoma | Silent corticotroph adenoma               | macro       | 0.7         | +          |
| 30          | female | 37  | Nonfunctioning adenoma | silent plurihormonal adenoma<br>(PRL, GH) | macro       | 2.7         | -          |
| 31          | female | 36  | Nonfunctioning adenoma | Gonadotroph adenoma                       | macro       | 2.8         | -          |
| 32          | female | 50  | Nonfunctioning adenoma | Silent corticotroph adenoma               | macro       | 1.8         | -          |
| 33          | female | 21  | Nonfunctioning adenoma | Silent thyrotroph adenoma                 | macro       | 3.2         | -          |
| 34          | male   | 68  | Nonfunctioning adenoma | Silent corticotroph adenoma               | macro       | 1.4         | -          |
| 35          | female | 50  | Nonfunctioning adenoma | Silent corticotroph adenoma               | macro       | 1.8         | -          |
| 36          | male   | 84  | Nonfunctioning adenoma | Gonadotroph adenoma                       | macro       | 1.6         | +          |
| 37          | female | 39  | Nonfunctioning adenoma | Silent corticotroph adenoma               | macro       | 3.2         | -          |
| 38          | male   | 50  | Nonfunctioning adenoma | Gonadotroph adenoma                       | macro       | 1.5         | -          |
| 39          | female | 62  | Nonfunctioning adenoma | Gonadotroph adenoma                       | macro       | 0.8         | -          |
| 40          | male   | 53  | Nonfunctioning adenoma | Gonadotroph adenoma                       | macro       | 3.6         | -          |
| 41          | female | 52  | Nonfunctioning adenoma | Silent corticotroph adenoma               | macro       | 0.3         | -          |
| 42          | female | 54  | Nonfunctioning adenoma | Gonadotroph adenoma                       | macro       | 2.1         | -          |
| 43          | male   | 41  | Nonfunctioning adenoma | Gonadotroph adenoma                       | macro       | 1.8         | -          |
| 44          | female | 30  | Nonfunctioning adenoma | Silent corticotroph adenoma               | macro       | 2.7         | -          |
| 45          | male   | 53  | Nonfunctioning adenoma | Gonadotroph adenoma                       | macro       | 2.2         | -          |
| 46          | male   | 56  | Nonfunctioning adenoma | Gonadotroph adenoma                       | macro       | 0.9         | -          |

## Supplemental Table2A

qRT-PCR primers used to measure mRNA expression (human *MLH1*, *PMS2*, *MSH2*, *MSH6*, *MLH3*, *MSH3*, *PMS1*, *EPCAM*, *ATR*, and *GAPDH*).

| human |         | Primers                    | length | PCR products size |
|-------|---------|----------------------------|--------|-------------------|
| MLH1  | Forward | 5'-AGCAGCACATCGAGAGCAA     | 19mer  | 125bp             |
|       | Reverse | 5'-CGAGGTCAGACTTGTGTGG     | 20mer  |                   |
| PMS2  | Forward | 5'-GCATGGAGTTGGAAGGAGTT    | 20mer  | 106bp             |
|       | Reverse | 5'-CATGTGGTAGACCTCATTACAG  | 22mer  |                   |
| MSH2  | Forward | 5'-ACCAGCAGCAAAGAAGTGCT    | 20mer  | 86bp              |
|       | Reverse | 5'-AGGGCATTGTTCACCTTG      | 20mer  |                   |
| MSH6  | Forward | 5'-CATGCGGCGACTGTCTAT      | 19mer  | 145bp             |
|       | Reverse | 5'-CAGAATTACTGGCGACACA     | 20mer  |                   |
| MLH3  | Forward | 5'-TGCCACTGACTGCCAGAAG     | 20mer  | 99bp              |
|       | Reverse | 5'-CAATAAGCGGCAACTTTCC     | 20mer  |                   |
| MSH3  | Forward | 5'-AGGAAGGAGGAAGTGATCTGG   | 21mer  | 151bp             |
|       | Reverse | 5'-TGCAGAGATTCTGTCTGGACTC  | 22mer  |                   |
| PMS1  | Forward | 5'-CATCACTTCGGTGGTCAATG    | 20mer  | 123bp             |
|       | Reverse | 5'-CCGTATCTCGCACCTCAAT     | 20mer  |                   |
| EPCAM | Forward | 5'-ACTTTTGCCGAGCTCAG       | 18mer  | 104bp             |
|       | Reverse | 5'-GCACCAACTGAAGTACACTGG   | 21mer  |                   |
| ATR   | Forward | 5'-GCCAAGACAAATTCTGTGTCA   | 21mer  | 178bp             |
|       | Reverse | 5'-CTCATGGCTTCCACTCACAT    | 20mer  |                   |
| GAPDH | Forward | 5'-GAAAGGTGAAGGTCGGAGTCA   | 20mer  | 226bp             |
|       | Reverse | 5'-GAAAGATGGTGA TGGGATTTTC | 20mer  |                   |

## Supplemental Table2B

qRT-PCR primers used to measure mRNA expression (mouse *MSH2*, *MSH6*, *ATR*, and *GAPDH*).

| mouse |         | Primers                   | length | PCR products size |
|-------|---------|---------------------------|--------|-------------------|
| MSH2  | Forward | 5'-GTGCTGCCCTACCA GAGATG  | 20mer  | 157bp             |
|       | Reverse | 5'-ACTGCTGCCATGTCCA ACTT  | 20mer  |                   |
| MSH6  | Forward | 5'-CGGAGGCAA A GGATCTCAAC | 20mer  | 166bp             |
|       | Reverse | 5'-AACGTTCCATCAA A GGGATG | 20mer  |                   |
| ATR   | Forward | 5'-GGAGCTGGCGTCCATGAT     | 18mer  | 100bp             |
|       | Reverse | 5'-CTGGCAGAGAA TCTGTCTTGG | 21mer  |                   |
| GAPDH | Forward | 5'-GAAGGTGAAGGTCGGAGTCA   | 20mer  | 171bp             |
|       | Reverse | 5'-GAAGATGGTGATGGGATTTTC  | 20mer  |                   |

### Supplemental Table3

### Correlation between MMR gene expression and preoperative TV and MIB1-LI.

MMR gene expression was not associated with TV, MIB1-LI, or Knosp grade.

|       | Preoperative TV<br>(all sample)<br>(n=47) |         | Preoperative TV<br>(except<br>recurrence)<br>(n=33) |         | Preoperative TV<br>(nonfunctioning<br>tumor)<br>(n=34) |         | Preoperative TV<br>(nonfunctioning<br>tumor except<br>recurrence)<br>(n=20) |         | MIB-1 LI<br>(all sample)<br>(n=47)   |         |
|-------|-------------------------------------------|---------|-----------------------------------------------------|---------|--------------------------------------------------------|---------|-----------------------------------------------------------------------------|---------|--------------------------------------|---------|
|       | single<br>correlation<br>coefficient      | P value | single<br>correlation<br>coefficient                | P value | single<br>correlation<br>coefficient                   | P value | single<br>correlation<br>coefficient                                        | P value | single<br>correlation<br>coefficient | P value |
| MSH6  | -0.050                                    | 0.74    | 0.010                                               | 0.95    | -0.11                                                  | 0.52    | -0.082                                                                      | 0.73    | -0.16                                | 0.29    |
| MSH2  | -0.10                                     | 0.50    | -0.069                                              | 0.70    | -0.082                                                 | 0.65    | -0.057                                                                      | 0.81    | -0.19                                | 0.19    |
| MLH1  | -0.12                                     | 0.42    | -0.33                                               | 0.061   | 0.075                                                  | 0.67    | -0.10                                                                       | 0.67    | -0.07                                | 0.63    |
| PMS2  | -0.18                                     | 0.22    | -0.21                                               | 0.24    | -0.13                                                  | 0.46    | -0.18                                                                       | 0.44    | 0.15                                 | 0.31    |
| MLH3  | -0.21                                     | 0.16    | -0.24                                               | 0.17    | -0.15                                                  | 0.38    | -0.24                                                                       | 0.30    | -0.15                                | 0.31    |
| MSH3  | -0.11                                     | 0.47    | -0.15                                               | 0.41    | -0.053                                                 | 0.76    | -0.098                                                                      | 0.68    | -0.18                                | 0.23    |
| PMS1  | -0.17                                     | 0.26    | -0.16                                               | 0.38    | -0.10                                                  | 0.56    | -0.11                                                                       | 0.66    | -0.19                                | 0.21    |
| EPCAM | 0.021                                     | 0.89    | 0.17                                                | 0.35    | -0.013                                                 | 0.93    | 0.087                                                                       | 0.72    | -0.13                                | 0.39    |

※ simple linear regression analysis
